# Supplementary material for: Perioperative Glial Fibrillary Acidic Protein Is Associated with Long-Term Neurodevelopment Outcome of Infants with Congenital Heart Disease
Source: MDPI journal article supplement (doi:10.3390/children8080655), 2021-07-29
Supplement: s1 [file s1]

# R packages used

- base (R Core Team 2021a)
- boot (Davison and Hinkley 1997)
- Boruta (Kursa and Rudnicki 2010)
- caret (Kuhn 2020)
- dataMaid (Petersen and Ekstrøm 2019)
- flextable (Gohel 2021)
- ggstatsplot (Patil 2021)
- gtsummary (Sjoberg et al. 2021)
- here (Müller 2020)
- kableExtra (Zhu 2021)
- leaps (Fortran code by Alan Miller 2020)
- pROC (Robin et al. 2011)
- purrr (Henry and Wickham 2020)
- randomForestSRC (Ishwaran et al. 2008)
- readr (Wickham and Hester 2020)
- rms (Harrell Jr 2021)
- splines (R Core Team 2021b)
- tidyverse (Wickham et al. 2019)

## References

- Davison, A. C., and D. V. Hinkley. 1997. *Bootstrap Methods and Their Applications*. Cambridge: Cambridge University Press. <http://statwww.epfl.ch/davison/BMA/> (<http://statwww.epfl.ch/davison/BMA/>).
- Fortran code by Alan Miller, Thomas Lumley based on. 2020. *Leaps: Regression Subset Selection*. <https://CRAN.R-project.org/package=leaps> (<https://CRAN.R-project.org/package=leaps>).
- Gohel, David. 2021. *Flextable: Functions for Tabular Reporting*. <https://CRAN.R-project.org/package=flextable> (<https://CRAN.R-project.org/package=flextable>).
- Harrell Jr, Frank E. 2021. *Rms: Regression Modeling Strategies*. <https://CRAN.R-project.org/package=rms> (<https://CRAN.R-project.org/package=rms>).
- Henry, Lionel, and Hadley Wickham. 2020. *Purrr: Functional Programming Tools*. <https://CRAN.R-project.org/package=purrr> (<https://CRAN.R-project.org/package=purrr>).
- Ishwaran, H., U. B. Kogalur, E. H. Blackstone, and M. S. Lauer. 2008. "Random Survival Forests." *Ann. Appl. Statist.* 2 (3): 841–60. <https://arXiv.org/abs/0811.1645v1> (<https://arXiv.org/abs/0811.1645v1>).
- Kuhn, Max. 2020. *Caret: Classification and Regression Training*. <https://CRAN.R-project.org/package=caret> (<https://CRAN.R-project.org/package=caret>).
- Kursa, Miron B., and Witold R. Rudnicki. 2010. "Feature Selection with the Boruta Package." *Journal of Statistical Software* 36 (11): 1–13. <http://www.jstatsoft.org/v36/i11/> (<http://www.jstatsoft.org/v36/i11/>).
- Müller, Kirill. 2020. *Here: A Simpler Way to Find Your Files*. <https://CRAN.R-project.org/package=here> (<https://CRAN.R-project.org/package=here>).
- Patil, Indrajeet. 2021. "Visualizations with Statistical Details: The 'Ggstatsplot' Approach." *PsyArxiv*. <https://doi.org/10.31234/osf.io/p7mku> (<https://doi.org/10.31234/osf.io/p7mku>).
- Petersen, Anne Helby, and Claus Thorn Ekstrøm. 2019. "dataMaid: Your Assistant for Documenting Supervised Data Quality Screening in R." *Journal of Statistical Software* 90 (6): 1–38. <https://doi.org/10.18637/jss.v090.i06> (<https://doi.org/10.18637/jss.v090.i06>).
- R Core Team. 2021a. *R: A Language and Environment for Statistical Computing*. Vienna, Austria: R Foundation for Statistical Computing. <https://www.R-project.org/> (<https://www.R-project.org/>).
- . 2021b. *R: A Language and Environment for Statistical Computing*. Vienna, Austria: R Foundation for Statistical Computing. <https://www.R-project.org/> (<https://www.R-project.org/>).

- Robin, Xavier, Natacha Turck, Alexandre Hainard, Natalia Tiberti, Frédérique Lisacek, Jean-Charles Sanchez, and Markus Müller. 2011. "pROC: An Open-Source Package for r and s+ to Analyze and Compare ROC Curves." *BMC Bioinformatics* 12: 77.
- Sjoberg, Daniel D., Michael Curry, Margie Hannum, Joseph Larmarange, Karissa Whiting, and Emily C. Zabor. 2021. *Gtsummary: Presentation-Ready Data Summary and Analytic Result Tables*. <https://CRAN.R-project.org/package=gtsummary> (<https://CRAN.R-project.org/package=gtsummary>).
- Wickham, Hadley, Mara Averick, Jennifer Bryan, Winston Chang, Lucy D'Agostino McGowan, Romain François, Garrett Grolemund, et al. 2019. "Welcome to the tidyverse." *Journal of Open Source Software* 4 (43): 1686. <https://doi.org/10.21105/joss.01686> (<https://doi.org/10.21105/joss.01686>).
- Wickham, Hadley, and Jim Hester. 2020. *Readr: Read Rectangular Text Data*. <https://CRAN.R-project.org/package=readr> (<https://CRAN.R-project.org/package=readr>).
- Zhu, Hao. 2021. *kableExtra: Construct Complex Table with 'Kable' and Pipe Syntax*. <https://CRAN.R-project.org/package=kableExtra> (<https://CRAN.R-project.org/package=kableExtra>).
